# Supplementary material for: Oxygen-assisted reduction of Au species on Au/SiO2 catalyst in room temperature CO oxidation
Source: Royal Society of Chemistry journal article supplement (doi:10.1039/b803834a), 2008-01-01
Supplement: b803834a.pdf [file b803834a.pdf]

## Electronic Supporting Information (ESI) for:

Oxygen-assisted reduction of Au species on Au/SiO<sub>2</sub> catalyst in room temperature CO oxidation

Zili Wu, Shenghu Zhou, Haoguo Zhu, Sheng Dai and Steve H. Overbury\*

Center for Nanophase Materials Sciences and Chemical Science Division,

Oak Ridge National Laboratory, Oak Ridge, TN 37831. Email: [overburysh@ornl.gov](mailto:overburysh@ornl.gov)

### 1. Experimental

#### 1.1 Catalyst preparation

The synthesis of the Au precursor Au(en)<sub>2</sub>Cl<sub>3</sub> (en=ethylenediamine) is described previously<sup>1</sup>. To prepare the Au/SiO<sub>2</sub> sample, 0.27 g Au(en)<sub>2</sub>Cl<sub>3</sub> was dissolved in 150 ml H<sub>2</sub>O, the pH of the solution adjusted to 9.8 by 5.0 wt.% NaOH solution, and 3.0 g Cab-O-Sil fumed SiO<sub>2</sub> (S<sub>BET</sub> = 175 m<sup>2</sup>/g). The pH value of the solution dropped drastically after adding SiO<sub>2</sub>, and was re-adjusted to approximately 9.8 by NaOH solution. The suspension was stirred at 60 °C for 2 h, then filtered and washed with H<sub>2</sub>O to remove Cl<sup>-</sup>. The product was dried in vacuum at 70 °C for 5 h and then a reduction in 4% H<sub>2</sub>/Ar at 120°C for 2 h to reduce the Au before the storage of the sample. ICP measurement showed the actual Au content is 4.0 wt% and confirmed undetectable Cl<sup>-</sup> ion concentration. Before use the catalyst was calcined to 500 C to remove the ethylenediamine ligands

#### 1.2 IR study

In a typical IR study, 12 mg Au/SiO<sub>2</sub> sample powder was calcined in 2% O<sub>2</sub>/He at 500 °C (ramping rate of 10 °C/min at flow rate of 22 ml/min) for 2.5 h in a DRIFTS cell (HC-900, Pike Technologies). After cooling down to room temperature (23 °C) in O<sub>2</sub>/He, a stream of 2% CO/2%Ar/He was added into the 2%O<sub>2</sub>/He flow. The total flow rate was kept at 22 ml/min with CO : O<sub>2</sub> = 1 : 4 to achieve a space velocity of 110, 000 cm<sup>3</sup>/(h g<sub>cat</sub>). IR spectra were collected during the reaction on a Thermo Nicolet Nexus 670 spectrometer while the exiting stream was analyzed by a quadruple mass spectrometer (QMS) (OmniStar GSD-301 O2, Pfeiffer Vacuum). In the case of flowing CO alone over the sample, the calcined sample was first purged with He at room temperature for 20 min before contacting the CO flow (CO/Ar/He : He = 1 : 4). After flowing for 20 h, He was substituted by O<sub>2</sub>/He. IR spectra and QMS were followed the process all the time. QMS CO conversion (%) is calculated as following:

$$\text{Con\%} = 100 - 100 * P_{\text{CO}} / (P_{\text{CO}} + k * P_{\text{CO}_2})$$

where P<sub>CO</sub>, P<sub>CO<sub>2</sub></sub> are the QMS partial pressure of CO and CO<sub>2</sub>, respectively; k is QMS response factor ration between CO and CO<sub>2</sub>, calculated from a QMS calibration curve of a know mixture of CO and CO<sub>2</sub> with different CO/CO<sub>2</sub> ratios.

### 1.3 TEM measurement

Z-contrast STEM (Hitachi HD2000 STEM) measurements were made on the calcined Au/SiO<sub>2</sub> sample before and after CO oxidation at room temperature.

### References:

1. H. G. Zhu, Z. Ma, J. C. Clark, Z. W. Pan, S. H. Overbury and S. Dai, *Applied Catalysis a-General*, 2007, **326**, 89-99.

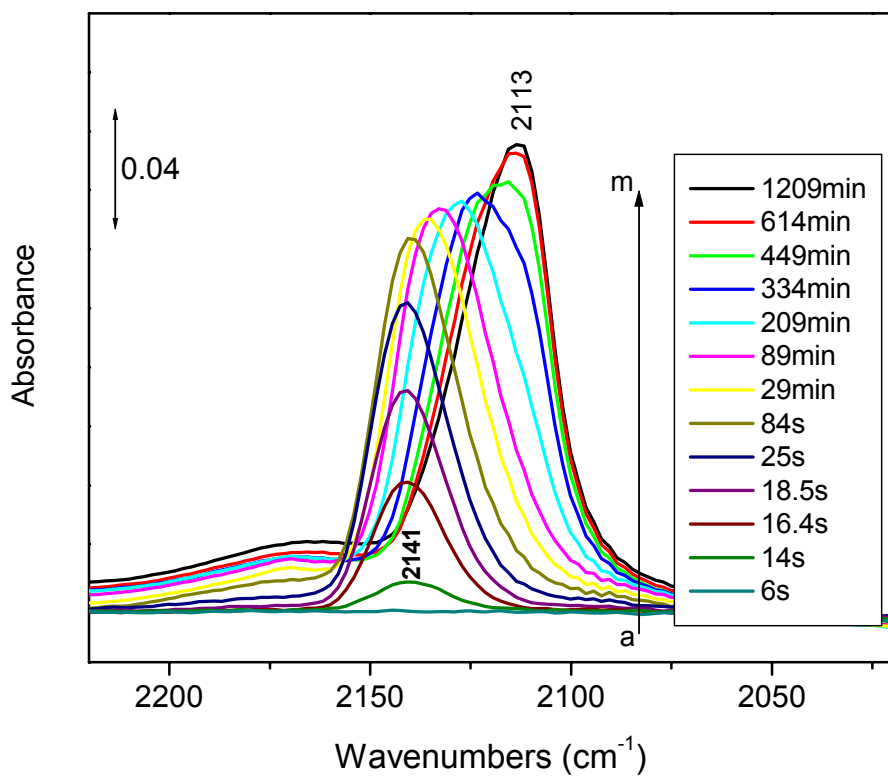

Figure S1. IR spectra during CO oxidation on calcined Au/SiO<sub>2</sub> at room temperature.

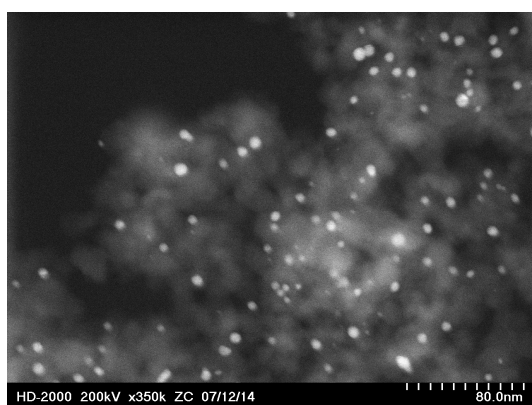

Before reaction

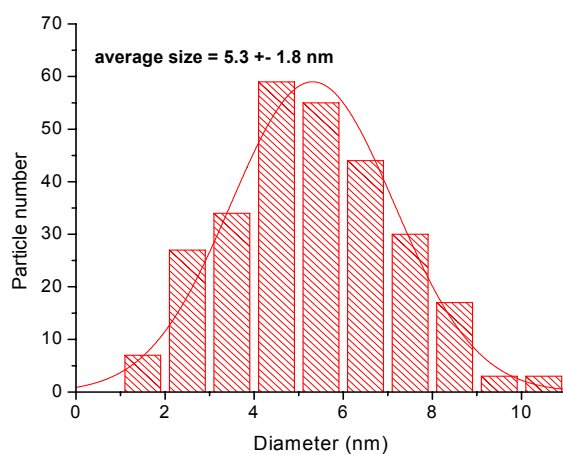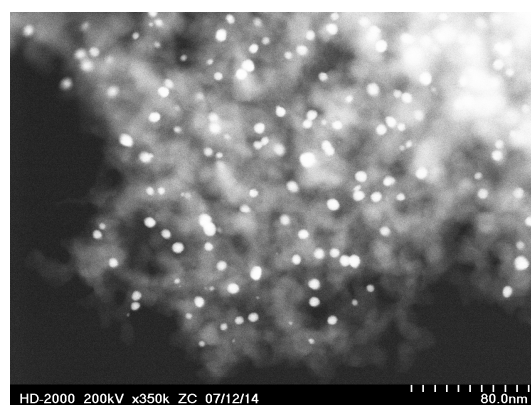

After reaction

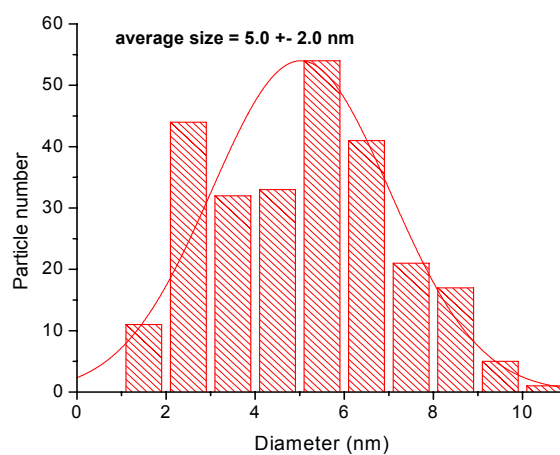

Figure S2. TEM graphs of 500°C -calcined Au/SiO<sub>2</sub> before and after CO oxidation (for about 20 hours) at room temperature.

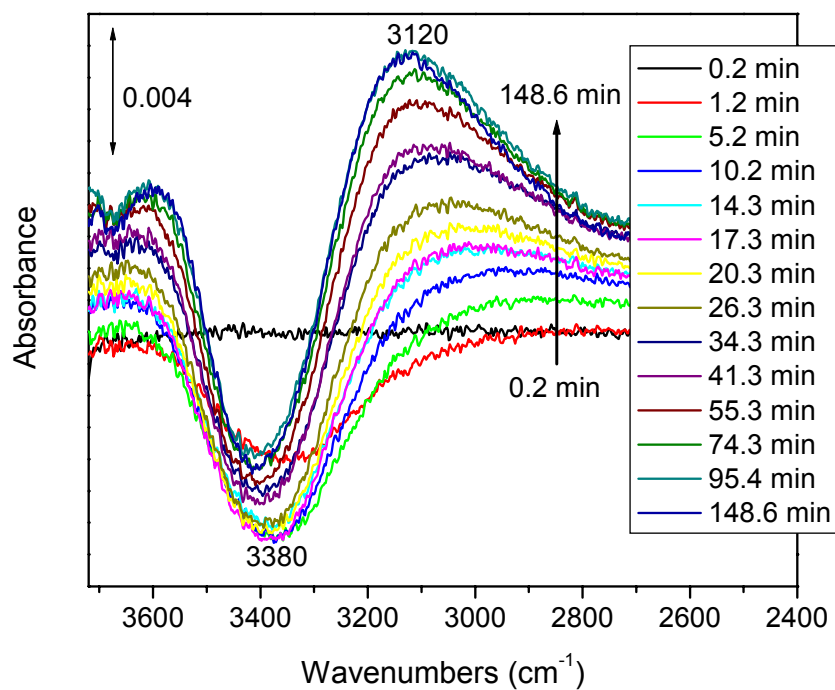

Figure S3. Difference IR spectra between before and after addition of O<sub>2</sub>/He into CO flow on Au/SiO<sub>2</sub> after CO flows for 20 h.
